# Supplementary material for: A mitofusin 2/HIF1α axis sets a maturation checkpoint in regenerating skeletal muscle
Source: JCI journal article supplement (doi:10.1172/jci161638), 2022-09-20
Supplement: sd1 [file 1]

1006  
1007  
1008  
1009  
1010  
1011  
1012  
1013  
1014  
1015  
1016  
1017  
1018  
1019  
1020  
1021  
1022  
1023  
1024  
1025  
1026  
1027  
1028

**Supplemental Materials for**

**A Mitofusin 2 – Hif1 $\alpha$  axis sets a maturation checkpoint in regenerating skeletal muscle.**

Xun Wang, Yuemeng Jia, Jiawei Zhao, Nicholas P. Lesner, Cameron J. Menezes, Spencer D. Shelton, Siva Sai Krishna Venigalla, Jian Xu, Chunyu Cai, Prashant Mishra

Supplemental Methods

Captions for Supplemental Tables S1 to S5

Supplemental Figures S1 to S12

## 1029 **Supplemental Methods**

### 1030 Mice

1031 Throughout this study, all indicated genotypes refer to animals with conditional (floxed,  
1032 'f') alleles, targeted to the muscle satellite cell (MuSC) population using the *Pax7-Cre<sup>ERT2</sup>*  
1033 allele. *Mfn1<sup>ff</sup>* (gift from David Chan), *Mfn2<sup>ff</sup>* (gift from David Chan), *Rosa-STOP<sup>ff</sup>-*  
1034 *Mfn2<sup>T105M</sup>* (strain 025322), *Rosa-STOP<sup>ff</sup>-HA-HIF1dPA* (strain 009673), *Hif1 $\alpha$ <sup>ff</sup>* (strain  
1035 007561), *Vhl<sup>ff</sup>* (strain 012933), *Pax7-Cre<sup>ERT2</sup>* (strain 012476), and *mito-Dendra2<sup>ff</sup>* (strain  
1036 018385) were purchased from The Jackson Laboratory.

1037 All mice were maintained on C57BL6 backgrounds, and conditional alleles were  
1038 maintained in a homozygous state, and combined with Cre driver alleles by breeding. For  
1039 *mfn2<sup>ff</sup>* animals, we isolated a recombined chromosome with *Pax7-Cre<sup>ERT2</sup>* as previously  
1040 described (10). Both male and female mice were used in all experiments; if sex specific  
1041 differences were not present, male and female mice were analyzed together. All mice  
1042 were housed in the Animal Resource Center at the University of Texas Southwestern  
1043 Medical Center under a 12 hour light-dark cycle and were fed ad libitum. All animal  
1044 protocols were approved by the University of Texas Southwestern Institutional Animal  
1045 Care and Use Committee (protocol 2015-101323).

1046

### 1047 Mouse injections

1048 For tamoxifen (Cayman Chemical, #132585) injection of *Pax7-Cre<sup>ERT2</sup>* mice (Figure 1A,  
1049 2C), tamoxifen was dissolved in corn oil (Sigma-Aldrich, #C8267), and 75 mg/kg body  
1050 mass was administered by intraperitoneal injection to 6-8-week-old mice, once per day

1051 for 5 consecutive days. Mice were euthanized and tissue harvested at various timepoints  
1052 after tamoxifen administration as indicated.

1053 For PX-478 (MedChem Express, #HY-10231) administration, starting at 14 days post  
1054 injury, mice were treated with PX-478 (or vehicle, PBS) by intraperitoneal injection at 100  
1055 mg/kg body mass every other day for 14 days. Mice were then euthanized at 28 days post  
1056 injury and tissue was harvested for analysis.

1057 For GSK-J4 (Cayman Chemical, #12073) administration, starting at 14 days post injury,  
1058 mice were treated with GSK-J4 (or vehicle, DMSO) by intraperitoneal injection at 75  
1059 mg/kg body mass every day for 14 days, based on a previous protocol (61). Mice were  
1060 then euthanized at 28 days post injury and tissue was harvested for analysis.

1061

#### 1062 Muscle injury experiments

1063 For barium chloride ( $\text{BaCl}_2$ , Alfa Aesar, #0361-37-2) injury experiments, 6-8 week old  
1064 mice were pretreated with tamoxifen as above, and a muscular  $\text{BaCl}_2$  injury was  
1065 administered based on previous protocols (64). Briefly, mice were anesthetized with  
1066 isoflurane, and tibialis anterior (TA) muscles were directly injected with 50  $\mu\text{l}$  of 1.2 %  
1067  $\text{BaCl}_2$  (in sterile saline) using a sterile 29-gauge needle. Postoperative analgesia  
1068 (meloxicam, 2 mg/kg/24 h, Sigma-Aldrich) was administered subcutaneously once per  
1069 day for two days. Mice were euthanized and TA tissue harvested on the indicated days  
1070 post injury.

1071 For femoral artery ligation experiments, 6-8 week old mice were pretreated with tamoxifen  
1072 as above. Femoral artery ligation was performed as previously described (53). Briefly,  
1073 mice were anesthetized with isoflurane, followed by a surgical incision overlying the

1074 medial left thigh muscle. The femoral artery was isolated and dissected away from the  
1075 femoral vein and nerve, and ligated with 7-0 suture. Postoperative analgesia (meloxicam,  
1076 2 mg/kg/24 h, Sigma-Aldrich) was administered subcutaneously once per day for two  
1077 days. Mice were euthanized and TA tissue harvested on the indicated days post-ligation.

1078

#### 1079 Isolation of regenerating muscle for analysis

1080 Following anesthesia under isoflurane, the tibialis anterior muscles were rapidly  
1081 dissected, and immediately frozen in liquid nitrogen cooled 2-methylbutane. For histology  
1082 analysis, frozen muscles were embedded in O.C.T compound (Fisher Scientific, # 23-  
1083 730-571). 10  $\mu$ M sections were cut on a cryostat (Leica CM3050S). For H&E staining,  
1084 slides were prepared following the protocol from the TREAT-NMD website  
1085 ([http://www.treat-nmd.eu/downloads/file/sops/cmd/MDC1A\\_M.1.2.004.pdf](http://www.treat-nmd.eu/downloads/file/sops/cmd/MDC1A_M.1.2.004.pdf)). Sections  
1086 were imaged using an Olympus IX83 microscope and analyzed with Image J software  
1087 (NIH) to calculating myofiber numbers and size. For other analyses (western blot, ChIP-  
1088 seq, ChIP-qPCR, qRT-PCR, qPCR), fresh muscles were imaged on a Nikon SMZ18  
1089 stereomicroscope and regenerating Dendra<sup>+</sup> sections were dissected and flash frozen at  
1090 -80°C for further analysis.

1091

#### 1092 Metabolite Mass Spectrometry Analysis

1093 Frozen muscles were pulverized on liquid nitrogen, and metabolites extracted with 80%  
1094 acetonitrile and centrifuged at 17,000xg at 4 °C. The metabolite containing supernatant  
1095 was injected onto a HILIC column (Millipore ZIC-pHILIC, 5  $\mu$ m, 2.1 × 150 mm).  
1096 Chromatographic separation was achieved using 10 mM ammonium acetate, pH 9.8

1097 (solvent A) and acetonitrile (solvent B) with a constant flow rate of 0.25 mL min<sup>-1</sup>. The  
1098 column was equilibrated with 90% solvent B. The gradient was as follows: 0-15 min linear  
1099 ramp from 90% B to 30% B; 15-18 min isocratic flow of 30% B; 18-19 min linear ramp  
1100 from 30% to 90% B; 19-27 min column regeneration with isocratic flow of 90% B.  
1101 Metabolites were detected with a QExactive HF-X hybrid quadrupole orbitrap high-  
1102 resolution mass spectrometer (Thermo Scientific) coupled to a Vanquish UHPLC. Data  
1103 was acquired using HRMS full scan (precursor ion only) switching between polarities.  
1104 Data was integrated and analyzed using EI-MAVEN (Elucidata) (65).

1105

#### 1106 Human Subjects

1107 Human muscle biopsy specimens were collected from archived patient frozen muscle  
1108 biopsy tissue stored at -84°C at the UT Southwestern Neuropathology laboratory. The  
1109 tissue usage was approved as a retrospective study on archived excess patient tissue by  
1110 the local ethics committee (STU 012016-082), thereby waiving the need for further  
1111 consent. Only de-identified relevant patient information was provided. Control human  
1112 muscle tissue were from age and gender matched patients who underwent muscle biopsy  
1113 for various reasons and had normal muscle histology and muscle enzyme histochemical  
1114 studies.

1115

#### 1116 Immunofluorescence protocols

1117 For mouse muscle sections, freshly frozen 10 μm sections (prepared as above) were  
1118 fixed in formalin at room temperature for 5 min and then blocked with blocking buffer  
1119 ((0.25% Triton X-100 (Sigma-Aldrich, #X100) and 10% goat serum (GIBCO, # 16210064))

1120 in PBS at room temperature for 1 hour. Sections were incubated with primary antibodies  
1121 diluted in blocking buffer at 4°C overnight. On the second day, sections were washed with  
1122 PBS and then incubated with secondary antibodies diluted in blocking buffer at room  
1123 temperature for 1 hour. Sections were stained with DAPI diluted in PBS, and then washed  
1124 with PBS and mounted with fluoro-gel mounting medium (Electron Microscopy Sciences,  
1125 #1798510).

1126 For human muscle sections, slides were deparaffinized with xylene and rehydrated with  
1127 a graded series of ethanol (100%, 90%, 80%, 70%, 50%, 30% and distilled water).  
1128 Antigen retrieval was performed with sodium citrate buffer (10 mM pH 6). Sections were  
1129 blocked with blocking buffer at room temperature for 1 hour. Sections were incubated with  
1130 primary antibodies diluted in blocking buffer at 4°C overnight. On the second day, sections  
1131 were washed with PBS and then incubated with secondary antibodies diluted in blocking  
1132 buffer at room temperature for 1 hour. Sections were stained with DAPI diluted in PBS,  
1133 and then washed with PBS and mounted with fluoro-gel mounting medium.

1134 For myotube staining, myotube cultures were fixed in formalin at room temperature for 5  
1135 min and then blocked with blocking buffer at room temperature for 1 hour. Cells were  
1136 incubated with primary antibodies diluted in blocking buffer at 4°C overnight. On the  
1137 second day, cells were washed with PBS and then incubated with secondary antibodies  
1138 diluted in blocking buffer at room temperature for 1 hour. Cells were stained with DAPI,  
1139 diluted in PBS, and then washed with PBS and mounted with fluoro-gel mounting  
1140 medium.

1141 Slides were imaged using a Zeiss LSM780 Inverted confocal microscope and analyzed  
1142 using ImageJ software. The following antibodies were used: Myh3 (BF-45), Myogenin

1143 (F5D), Myh (MF20), Myhc type I (BA-D5), Myhc type IIa (SC-71), Myhc type IIb (BF-F3),  
1144 Myhc type IIx (6H1), Myh8 (N3.36), CD31 (2H8) (all from Developmental Studies  
1145 Hybridoma Bank, 2 µg/ml), MyoD (Santa Cruz Biotechnology, #sc-32758, 1:500), Laminin  
1146 (Sigma-Aldrich, #L9393, 1:500), Hif-1α (Novus Biologicals, #NB100-479, 1:500), NFATc2  
1147 (Thermo Fisher, #MA1-025, 1:500), Mfn2 (Proteintech, #12186-1-AP, 1:500), Alexa Fluor  
1148 488 WGA (Thermo Fisher, #W11261, 5 µg/mL), DyLight 405 Goat Anti-mouse IgM  
1149 (Jackson ImmunoResearch, #115-475-075, 1:500), Alexa Fluor 647 goat anti-Armenian  
1150 hamster (Jackson ImmunoResearch, #127-605-160, 1:500), Alexa Fluor 594 goat anti-  
1151 rabbit (#A11012), Alexa Fluor 594 goat anti-mouse IgM (#A21044), Alexa Fluor 594 goat  
1152 anti-mouse IgG2b (#A21145), Alexa Fluor 594 goat anti-mouse IgG1 (#A21125), Alexa  
1153 Fluor 488 goat anti-rabbit IgG(H+L) (#A11034), and Alexa Fluor 647 goat anti-mouse  
1154 IgG2b (#A21242) (all from Invitrogen, 1:500).

1155

#### 1156 MuSCs isolation via Fluorescence-activated cell sorting (FACS)

1157 Murine MuSCs were isolated follow a previously reported protocol (66). Following carbon  
1158 dioxide asphyxiation and cervical dislocation, skeletal muscle was rapidly dissected and  
1159 sequential digested with Collagenase II (1 hr) and Dispase (30 minutes) at 37°C.  
1160 Mononucleated cells were collected through a 70 µm cell strainer, and suspended in  
1161 HBSS with 2% horse serum (GIBCO, #16050114). Cells were then incubated with the  
1162 following antibodies on a rotator at 4°C for 30 min: APC-conjugated anti-mouse CD31  
1163 (BioLegend, clone MEC13.3, #102510, 1:100), APC-conjugated anti-mouse CD45  
1164 (BioLegend, clone 30-F11, #103112, 1:100), PerCP-Cy5.5-conjugated anti-mouse Sca-1  
1165 (Invitrogen, Clone D7, #45598182, 1:100), Biotin-conjugated anti-mouse CD34

1166 (Invitrogen, clone RAM34, #13034181, 1:100). After incubation, cells were washed twice,  
1167 and then incubated with PE/Cy7-conjugated streptavidin (BioLegend, 1:100, #405206) on  
1168 a rotator at 4 °C for 20 min. Cells were washed twice, and then suspended with 2% horse  
1169 serum in HBSS with DAPI. Quiescent MuSCs were identified as the CD34<sup>+</sup>, CD31<sup>-</sup>, CD45<sup>-</sup>  
1170 , DAPI<sup>-</sup> and Sca-1<sup>-</sup>. Purity was confirmed by immunofluorescence staining for Pax7  
1171 (ab528428, Developmental Studies Hybridoma Bank). A representative gating strategy is  
1172 provided in Figure S11A.

1173 For quiescent and activated MuSCs after injury, mononucleated cells from mito-Dendra2  
1174 mice were resuspended with 2% horse serum in HBSS with DAPI. Quiescent MuSCs  
1175 were identified as the DAPI<sup>-</sup>, GFP<sup>+</sup> and CD34<sup>+</sup>, and activated MuSCs were identified as  
1176 DAPI<sup>-</sup>,GFP<sup>+</sup> and CD34<sup>-</sup>. A representative gating strategy is provided in Figure S11B. All  
1177 sorting was performed at the Moody Foundation Flow Cytometry Facility on a FACS Aria  
1178 flow cytometer (BD Biosciences). Data was analyzed by FACSDiva (BD Biosciences) or  
1179 FlowJo (Version10.6.1) software.

1180

#### 1181 In vitro MuSC proliferation and fusion assay

1182 To measure MuSC proliferation, 10,000 freshly isolated MuSCs were plated in each well  
1183 of a 12-well plate with growth medium (Ham's F-10 (HyClone, SH30025.01))  
1184 supplemented with 10% horse serum, 1% penicillin/streptomycin and 2.5 ng/ml basic  
1185 fibroblast growth factor (Preprotech, 100-18B). Cell numbers per well were counted each  
1186 day using a Celigo imaging cytometer (Nexcelom Bioscience, 5.1.0.0).

1187 To measure MuSC fusion, 100,000 freshly isolated MuSCs were plated in an eight-well  
1188 chamber slide (Thermo Fisher Scientific, 177445) with growth medium (Ham's F-10



1189 (HyClone, SH30025.01)) supplemented with 10% horse serum, 1%  
1190 penicillin/streptomycin and 2.5 ng/ml basic fibroblast growth factor (Preprotech, 100-18B)  
1191 for 24 hour. The media was then switched to differentiation medium (DMEM with 2%  
1192 horse serum and 1% penicillin/ streptomycin) for 4 days. Cells were fixed and stained with  
1193 antibodies against myosin heavy chains (Myh (MF20, Developmental Studies Hybridoma  
1194 Bank), and Myh8 (N3,36, Developmental Studies Hybridoma bank) and DAPI. The fusion  
1195 index was calculated as the fraction of total nuclei in myosin-positive myotubes.

1196

1197 Mitochondrial reactive oxygen species (ROS) and mitochondrial membrane potential  
1198 ( $\Delta\Psi_m$ ) analysis

1199 Mitochondrial ROS and mitochondrial membrane potential were measured in isolated  
1200 MuSCs at 5 days after the first dose of tamoxifen as previously described (67). For  
1201 mitoROS measurements, MuSCs were resuspended in HBSS with 5  $\mu$ M final  
1202 concentration mitoSOX (mitochondrial superoxide levels, Thermo Fisher, M36008) and  
1203 then incubated at 37°C for 30 minutes. After incubation, cells were washed and  
1204 resuspended in HBSS with DAPI, followed by immediate FACS analysis.

1205 For mitochondrial  $\Delta\Psi_m$  measurements, isolated MuSCs were resuspended in  
1206 mitochondrial assay buffer with the indicated mitochondrial substrates and inhibitors (see  
1207 below for recipes). Cell suspensions were incubated at 37 °C for 30 min. After incubation,  
1208 cells were washed and then suspended in HBSS with DAPI, followed by immediate FACS  
1209 analysis.

1210 The mitochondrial assay buffer contained 220 mM mannitol, 70 mM sucrose, 10 mM  
1211  $\text{KH}_2\text{PO}_4$ , 5 mM  $\text{MgCl}_2$ , 2 mM HEPES and 1 mM EGTA, pH 7.4, supplemented with fresh

1212 TMRE (Invitrogen, T669; final concentration, 150 nM) and fresh PMP reagent (Agilent,  
1213 102504-100; final concentration, 3 nM). Pyruvate/malate buffer contained mitochondrial  
1214 assay buffer supplemented with 10 mM pyruvate and 5 mM malate, pH 7.4. Inhibitor  
1215 concentrations were 5  $\mu$ M for CCCP and 5  $\mu$ M for rotenone.

1216

#### 1217 Extracellular flux (Seahorse) assay

1218 Freshly isolated MuSCs were plated in Seahorse XFe96 cell culture plates overnight with  
1219 growth medium (Ham's F-10 (HyClone, SH30025.01)) supplemented with 10% horse  
1220 serum, 1% penicillin/streptomycin and 2.5 ng/ml basic fibroblast growth factor  
1221 (Preprotech, 100-18B). The following day, cells were washed twice with 200  $\mu$ l per well  
1222 assay medium (DMEM (Sigma-Aldrich, D5030) with 10 mM glucose, 2 mM L-glutamine,  
1223 1 mM sodium pyruvate and 1% penicillin/streptomycin), and 150  $\mu$ l assay medium was  
1224 added to each well after the second wash. Cells were transferred to a 37°C, CO<sub>2</sub>-free  
1225 incubator for 1 hour. Oxygen consumption measurements were performed in a Seahorse  
1226 XFe96 instrument using a 3 minute mix, 3 minute measure cycle with three  
1227 measurements recorded at baseline and after injection of each compound. The following  
1228 inhibitors were sequentially used at the indicated final concentrations: 2  $\mu$ M oligomycin,  
1229 3  $\mu$ M CCCP (carbonyl cyanide m-chlorophenyl hydrazone) and 3  $\mu$ M antimycin A. Data  
1230 collection was performed with WAVE (v.2.4.1.1) software. At the completion of the  
1231 experiment, cells were fixed with formalin, stained with DAPI, and cell counts were  
1232 measured per well using a Celigo imaging cytometer (Nexcelom Bioscience, 5.1.0.0).  
1233 Mitochondrial OCR (oxygen consumption rates) were calculated as basal (pre-  
1234 oligomycin) OCR – baseline (post-antimycin) OCR. Maximal OCR was calculated as

1235 CCCP-stimulated OCR – baseline (post-antimycin) OCR. OCR values were normalized  
1236 by the cell count per well.

1237

#### 1238 RNA isolation and sequencing

1239 Total RNA was purified from FACS-isolated MuSCs using the RNeasy Micro Kit (QIAGEN  
1240 # 74004) according to manufacturer's instructions. Library preparation was performed  
1241 using the SMARTer stranded pico input total RNA-seq kit (Takara, #634411) following  
1242 manufacturer instructions. Next generation sequencing was performed using an Illumina  
1243 NextSeq 500 by the Children's Research Institute's Sequencing Facility at UT  
1244 Southwestern Medical Center. RNA-seq analysis was performed on BICF RNASeq  
1245 Analysis Workflow (<ssh://git@git.biohpc.swmed.edu/BICF/Astrocyte/rnaseq.git>) provided  
1246 by the UTSouthwestern Bioinformatics Core Facility. Hif-1 $\alpha$  pathway enrichment analysis  
1247 was performed using Gene set enrichment analysis (GSEA) (68, 69). Gene ontology  
1248 analysis was performed using DAVID (<https://david-d.ncifcrf.gov/home.jsp>).

1249

#### 1250 Chromatin Immunoprecipitation Sequencing (ChIP-Seq) and ChIP-qPCR

1251 ChIP-Seq was performed as described previously (70, 71). Isolated MuSCs or minced  
1252 myofibers were crosslinked in 1% final concentration formaldehyde in PBS for 10 min at  
1253 room temperature, and then quenched using 125 mM final concentration glycine for 10  
1254 min at room temperature. For myofibers samples, the tissue was then dounced in cold  
1255 PBS. Following filtering with a 40  $\mu$ m cell strainer, the tissue was centrifuged at 2000 rpm  
1256 for 5 min, and then washed twice with cold PBS. Chromatin was sonicated to around 500  
1257 bp in buffer 0 (10 mM Tris-HCl, 1 mM EDTA, 0.1% sodium deoxycholate, 0.1% SDS, 1%

1258 Triton X-100, 0.25% sarkosyl, pH 8.0). Sonicated chromatin was incubated with primary  
1259 antibodies at 4 °C overnight. On the second day, protein A/G Dynabeads (Thermo Fisher,  
1260 #PI26162) were added to the ChIP reactions and incubated for 3 hours at 4°C.  
1261 Dynabeads were separated and washed twice with 1 ml of buffer 0, twice with 1 ml of  
1262 buffer 0.3 (buffer 0 with 0.3 M NaCl), twice with 1 ml of LiCl buffer (10 mM Tris-HCl, 1 mM  
1263 EDTA, 0.5% sodium deoxycholate, 0.5% NP-40, 250 mM LiCl, pH 8.0), and twice with 1  
1264 ml of TE buffer (10 mM Tris-HCl, 1 mM EDTA, pH 8.0). The chromatin was then eluted in  
1265 SDS buffer (1% SDS, 10 mM EDTA, 50 mM Tris-HCl, pH 8.0) followed by reverse  
1266 crosslinking at 65°C overnight. Pulldown DNA was incubated at 37°C with RNaseA (10  
1267 mg/ml) and protease K (0.2 mg/ml) for 2 hrs to remove residual RNA and protein, and  
1268 then purified using QIAquick Spin Columns (Qiagen, #28004). ChIP-seq experiments  
1269 were performed using previously validated antibodies: MyoD (Santa Cruz Biotechnology,  
1270 #sc-32758X), Myogenin (Developmental Studies Hybridoma Bank, #F5D), H3K9me3  
1271 (Abcam, #ab8898), H3K27me3 (Abcam, #ab6002), NFATc2 (Thermo Fisher, #MA1-025).  
1272 ChIP-seq libraries were prepared using NEBNext ChIP-Seq Library Prep Master Mix Set  
1273 for Illumina Kit (New England Biolabs, #E7645S). Next generation sequencing was  
1274 performed using an Illumina NextSeq 500 (Children's Research Institute's Sequencing  
1275 Facility at UT Southwestern Medical Center). For ChIP-seq experiments, we analyzed  
1276 three independent biological replicates in each group; except for NFATC2 binding, where  
1277 two independent biological replicates were analyzed in each group. Reads were aligned  
1278 against the reference genome mm10 with BWA (version 0.7.5) (72). Peak calling was  
1279 performed using MACS14 (version 1.4.2) using option -nomodel and p-value cutoff of 1e-  
1280 5 (73). The PcG target geneset (Table S2) was taken from (35). Differential peaks were

1281 identified using DiffBind (version 3.2.2) in R with a peak size of 250bp and  
1282 DBA\_NORM\_TMM normalization. For MyoD and MyoG ChIP-seq experiments, bigwig  
1283 files were generated from BAM files using bamCoverage from deeptools (version 3.5.0)  
1284 with 10 bp bin size, smoothLength of 100 bp, extendReads of 200 bp and a scaled factor  
1285 calculated from total reads. For H3K9me3 and H3K27me3 ChIP-seq experiments, bigwig  
1286 files were generated from BAM files using bamCoverage from deeptools (version 3.5.0)  
1287 with 10 bp bin size, smoothLength of 100 bp, extendReads of 200 bp and a scaled factor.  
1288 The scale factor for each sample was calculated based on normalization factor from  
1289 dba.normalize in DiffBind (version 3.2.2) using normalization method DBA\_NORM\_TMM.  
1290 To generate the peak heatmap graphs on H3K9me3 and H3K27me3, we generated  
1291 merged fastq files by combining the three replicates from the same condition, and then  
1292 ran the analysis as described above to generate a merged bigwig file. The peak heatmaps  
1293 were plotted using deeptools (3.5.0) with default parameters. k-means clustering was  
1294 performed with deeptool (version 3.5.0) with option -kmeans on normalized merged  
1295 bigwig files.

1296 For motif analysis (Figure S12A-C): To generate fasta files, BED files of H3K27me3 and  
1297 H3K9me3 ChIP-seq containing peak information of each genotype (WT, Mfn2, Vhl, Hif1)  
1298 were combined and merged by bedtools merge command. The fasta files were then  
1299 generated by extracting the sequence annotated in the BED files with mm10 genome as  
1300 the reference. The prepared fasta files were then used for motif discovery by the meme-  
1301 chip software in MEME suite package.

1302 To generate footprinting/enrichment plots (Figure S3F, S12D), the BigWig files of each  
1303 group were first merged by taking the mean and outputted as averaged Wiggled files

1304 using wiggletools software (“mean” as the operator). The wiggled files were then  
1305 converted back to BigWig files using the WigToBigwig command of UCSC tools. To get  
1306 transcription factor motif specific BED files, the whole genome level BED files were  
1307 generated using scanmotifgenomewide.pl command from the Homer software package.  
1308 For Myod and Myog, the Homer compatible motif files were downloaded directly from the  
1309 Homer motif library  
1310 (<http://homer.ucsd.edu/homer/motif/HomerMotifDB/homerResults.html>). Due to lack of a  
1311 Nfatc2 motif in Homer motif library, the Nfatc2 motif file was downloaded from the  
1312 JASPAR motif database and converted to Homer compatible format by dumpJapsar  
1313 command from the monaLisa R package. Genome wide motif BED files were then  
1314 overlapped with the CHIP-seq peak BED files, which were then used as the input files for  
1315 computeMatrix command of the deeptools software. The computed matrix files were then  
1316 used for generating the footprinting plots.

1317 For CHIP-qPCR, pulldown DNA was incubated at 37°C with RNaseA (10 mg/ml) and  
1318 protease K (0.2 mg/ml) for 2 hrs, and purified using QIAquick Spin Columns (Qiagen,  
1319 #28004). qPCR was performed using iTaq Universal SYBR Green Supermix (Bio-Rad, #  
1320 1725120). The following primers sequences were used targeting the Myh8 gene:

1321 Primer #1-F: 5'-CAACAGAAAGCTGAAGAGTG-3'

1322 Primer #1-R: 5'-ACTGATACATCCAGTCTAGC-3'

1323 Primer #2-F: 5'-AAGGTATGTCAAGCCTCAGC-3'

1324 Primer #2-R: 5'-GTTTCTATGTACCCAATGTT-3'

1325

1326 Retroviruses generation and infection

1327 Mouse MyoD or NFATc2 cDNA were cloned into the retroviral vector pQCXIP (Clontech,  
1328 #631516). 3µg pQCXIP-empty vector or pQCXIP-MyoD or pQCXIP-NFATc2 plasmids  
1329 with 1 µg pCL-Eco (Addgene, 12371) plasmids were transfected using PEI (Polysciences,  
1330 #24765-1) into HEK293T (ATCC, #CRL-11268) cells at 80% confluence in a 6-well plate.  
1331 48 hours post- transfection, viral medium was collected and filtered through a 0.45 µm  
1332 filter. For 3T3-L1 (ATCC, #CL-173) experiments, plated the day prior to infection at 30%  
1333 confluence, and infected with viral mixture containing polybrene (Sigma-Aldrich, #H9268,  
1334 6 µg/ml) for 24 hours. Infected cells were selected with 2 µg/ml puromycin. Hypoxic cell  
1335 culture was performed using a hypoxic chamber (Billups-Rothenberg) at 37°C in 5% CO<sub>2</sub>  
1336 and 1% O<sub>2</sub> level.

1337

#### 1338 Quantitative PCR (qRT-PCR, qPCR)

1339 Total RNA was extracted from FACS-sorted MuSCs using the RNeasy Micro Kit (QIAGEN  
1340 #74004) following the manufacturer's instructions. After RNA isolation, real-time qRT-  
1341 PCR were performed with Luna Universal One-Step RT-qPCR Kit (New England Biolabs,  
1342 #E3005) following the manufacturer's protocol. Transcript levels were normalized to *β2-*  
1343 *microglobulin* (*β2M*) using the  $2^{-\Delta\Delta CT}$  method (74). For genomic PCR reactions, genomic  
1344 DNA was purified using phenol-choloroform extraction, and real time qPCR was  
1345 performed with the iTAQ Universal SYBR Green Supermix (Bio-Rad, #1725120). The  
1346 following primers sequences were used:

1347 Pgc-1α-F: 5'-CCCTGCCATTGTTAAGACC-3'

1348 Pgc-1α-R: 5'-TGCTGCTGTTCTGTTTTTC-3'

1349 Pgc-1β-F: 5'-TCCTGTAAAAGCCCGGAGTAT-3'

1350 Pgc-1 $\beta$ -R: 5'-GCTCTGGTAGGGGCAGTGA-3'  
1351 Hif-1 $\alpha$ -F: 5'-CCTGCACTGAATCAAGAGGTTGC-3'  
1352 Hif-1 $\alpha$ -R: 5'-CCATCAGAAGGACTTGCTGGCT-3'  
1353 Vhl-F: 5'-GTTTGTGCCATCCCTCAATGTCTG-3'  
1354 Vhl-R: 5'-ACCTGACGATGTCCAGTCTCCT-3'  
1355 Mfn1 $\alpha$ -F: 5'- ATGGCAGAAACGGTATCTCCA-3'  
1356 Mfn1 $\alpha$ -R: 5'- CTCGGATGCTATTCGATCAAGTT-3'  
1357 Mfn2-F: 5'- TGACCTGAATTGTGACAAGCTG-3'  
1358 Mfn2-R: 5'- AGACTGACTGCCGTATCTGGT-3'  
1359  $\beta$ 2 Microglobulin-F: 5'-TTCTGGTGCTTGTCTCACTGA-3'  
1360  $\beta$ 2 Microglobulin-R: 5'- CAGTATGTTCCGGCTTCCCATTC-3'  
1361 mtDNA-F: 5'- CCTATCACCCCTTGCCATCAT-3'  
1362 mtDNA -R: 5'- GAGGCTGTTGCTTGTGTGAC-3'  
1363 nDNA-F: 5'- ATGGAAAGCCTGCCATCATG-3'  
1364 nDNA-R: 5'- TCCTTGTTGTTTCAGCATCAC-3'

1365

#### 1366 Western blot analysis

1367 For 3T3-L1 (ATCC, #CL-173) experiments, trypsinized cells were spun down, washed  
1368 with PBS, and resuspended in RIPA buffer (Thermo Scientific, #89900) supplemented  
1369 with protease inhibitor cocktail (Roche, #11873580001), and put on ice for 30 min.  
1370 Lysates were spun down at 12,000g at 4°C for 10 min. Protein concentrations were  
1371 quantitated with the DC protein assay (Bio-Rad, #5000112). For MuSCs, 50,000 FACS-  
1372 isolated cells were collected in PBS, spun down and resuspended in 50 $\mu$ L RIPA buffer,



1373 and processed as above. For myofibers, regenerative myofibers were separated, and  
1374 minced in RIPA buffer supplemented with protease inhibitor cocktail, and put on ice for  
1375 30 min. Lysates were spun down at 12,000g at 4°C for 10 min. Protein concentrations  
1376 were quantitated with the DC protein assay. The following antibodies were used: Mfn1  
1377 (Proteintech, #13798-1-AP, 1:1000), Mfn2 (Proteintech, #12186-1-AP, 1:1000), Pgc-1 $\beta$   
1378 (Proteintech, #22378-1-AP, 1:1000), Hif-1 $\alpha$  (Novus Biologicals, #NB100-479, 1:1000),  
1379 NFATc2 (Thermo Fisher, #MA1-025, 1:1000), Histone H2B (Santa Cruz Biotechnology,  
1380 #sc-515808, 1:1000). H3K9me3 (Abcam, #ab8898, 1:1000), H3K27me3 (Abcam,  
1381 #ab6002, 1:1000), MyoD (Santa Cruz Biotechnology, #sc-32758, 1:1000), PDK4 (Abcam,  
1382 #ab214938, 1:1000), PDH (Cell Signaling Technology, #3205, 1:1000), p-PDH (Ser293)  
1383 (Cell Signaling Technology, #37115, 1:1000), KDM4A (Abcam, #ab191433, 1:1000),  
1384 KDM4B (Thermo Fisher, #PA5-115460, 1:1000), KDM4C (Thermo Fisher, # PA5-23065,  
1385 1:1000), Foxm1 (Abcam, #ab207298, 1:1000), KDM6A (Abcam, #ab253183, 1:1000),  
1386 KDM6B (Thermo Fisher, # PA5-72751, 1:1000), Histone3 (Abcam, # ab176840, 1:1000).  
1387

### 1388 Statistics

1389 No statistical tests were used to predetermine sample size, and no data were excluded.  
1390 Data sets for each group of measurement were tested for normality using the Shapiro-  
1391 Wilk test. If the data was not normally distributed, the data was log-transformed and  
1392 retested for normality. For normally-distributed data, groups were compared using the  
1393 two-tailed Student's t-test (for 2 groups), or one-way ANOVA or two-way ANOVA (> 2  
1394 groups), followed by Tukey's or Dunnett's test for multiple comparisons. For data that was  
1395 not normally distributed, we used non-parametric testing (Mann-Whitney or Kolmogorov-

1396 Smirnov tests for two groups and Kruskal-Wallis test for multiple groups), followed by  
1397 Dunn's multiple comparisons adjustment. A p-value < 0.05 was considered significant.  
1398 Multiple independent experiments with biological replicates were performed for all  
1399 reported data, and the number of biological replicates are indicated in the figures. For  
1400 representative imaging data, the experiment was conducted at least three times, with the  
1401 exception of human studies where the experiment was conducted twice.

1402

1403

1404

1405

1406

1407

1408

1409

1410

1411

1412

1413

1414

1415

1416

1417

1418

1419 **Supplementary Tables**

1420

1421 **Table S1:** Supplemental data analysis for MyoD and MyoG CHIP-seq analysis in wild-  
1422 type quiescent and activated muscle stem cells.

1423

1424 **Table S2:** Supplemental data analysis for H3K9me3 and H3K27me3 CHIP-seq analysis  
1425 in wild-type and *mfn2*<sup>-/-</sup> 14 dpi myofibers.

1426

1427 **Table S3:** Expression and gene ontology statistics for differentially expressed genes in  
1428 *mfn2*<sup>-/-</sup> vs. wild-type 2 dpi activated muscle stem cells.

1429

1430 **Table S4:** Metabolomic analysis of wild-type and *mfn2*<sup>-/-</sup> regenerating myofibers at 5 and  
1431 14 days post injury.

1432

1433 **Table S5:** Summary data for CNM patient and control specimens.

1434

1435

1436

1437

1438

1439

1440

1441

Figure S1

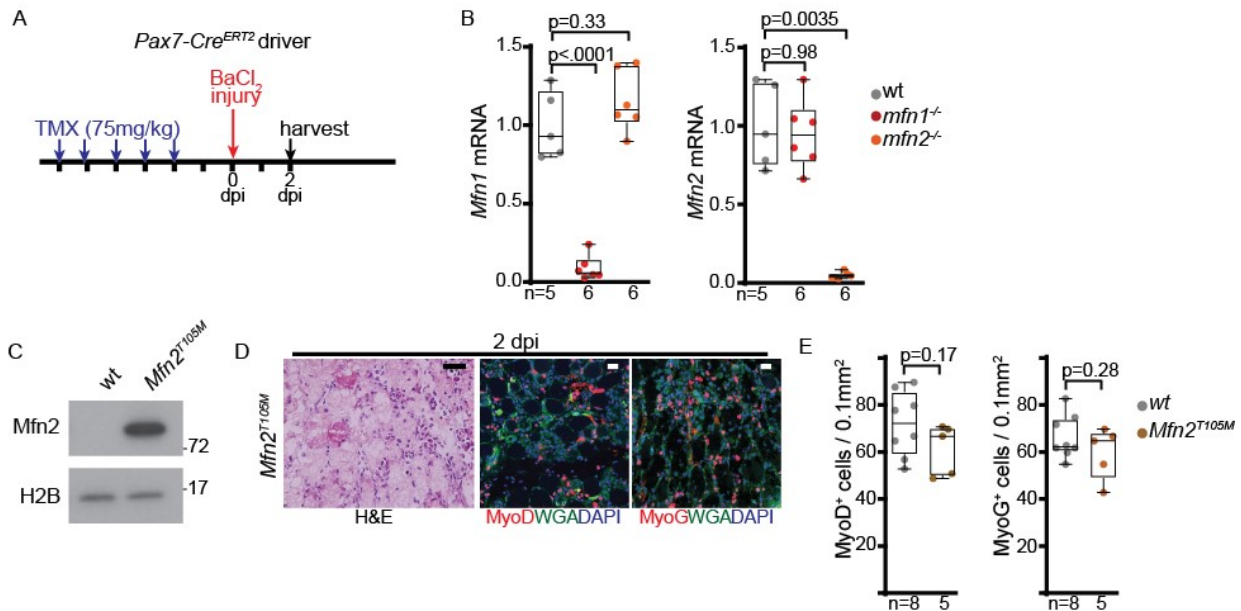

1442

1443 **Supplementary Figure S1. Depletion of Mfn1 or Mfn2 using the Pax7-Cre<sup>ERT2</sup>**

1444 **drivers. (A)** Schematic to induce recombination in MuSCs using the Pax7-Cre<sup>ERT2</sup> driver.

1445 Tamoxifen was administered for 5 consecutive days to induce recombination in QSCs,

1446 followed by BaCl<sub>2</sub> muscle injury. Activated MuSCs (ASCs) were harvested at 2 dpi. **(B)**

1447 *Mfn1* and *Mfn2* mRNA levels (relative to  $\beta$ 2-microglobulin; normalized) in 2 dpi ASCs of

1448 the indicated genotype, as measured by qRT-PCR. **(C)** Mfn2 levels in 2 dpi ASCs of the

1449 indicated genotype, assessed by Western blot. Molecular weight markers (in kDa) are

1450 indicated. Histone 2B (H2B) is shown as a loading control. **(D)** Representative histology

1451 (H&E) and immunofluorescence images of muscle cross-sections from *Mfn2*<sup>T105M</sup> mice of

1452 the indicated genotypes at 2 dpi. For immunofluorescence images, nuclei were visualized

1453 with DAPI (blue), myofiber borders were visualized with WGA (green), and MyoD or MyoG

1454 (red) were stained using the respective antibodies. Scale bar: 50  $\mu$ m. **(E)** The number of

1455 activated stem cells (MyoD<sup>+</sup> or MyoG<sup>+</sup>) from muscles of the indicated genotype at 2 dpi,

1456 normalized to cross-sectional area. Statistical significance was assessed using one way-

1457 ANOVA (B) or two-tailed t-tests (E) with adjustments for multiple comparisons. Box plots  
1458 indicate median and interquartile ranges from the indicated number of biological  
1459 replicates; whiskers are plotted using the Tukey method.

1460

1461

1462

1463

1464

1465

1466

1467

1468

1469

1470

1471

1472

1473

1474

1475

1476

1477

1478

1479

Figure S2

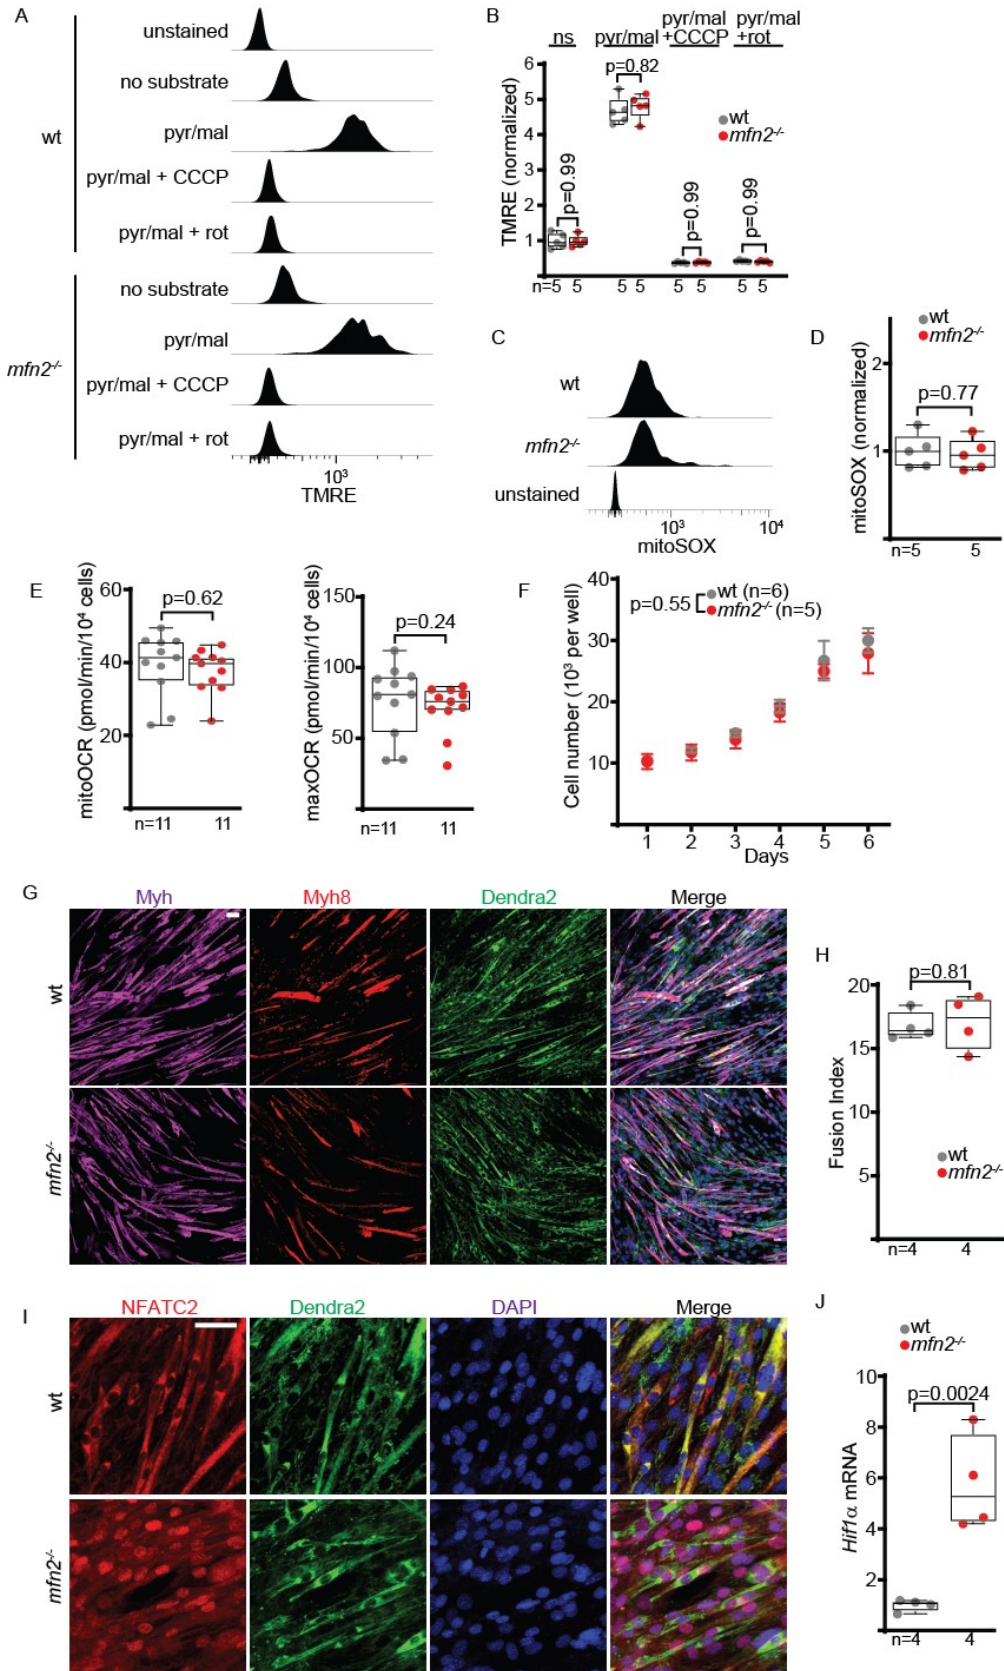

1481 **Supplementary Figure S2. In vitro analysis of wild-type and *mfn2*<sup>-/-</sup> MuSCs. (A)**  
1482 Representative FACS profiles of TMRE fluorescence for wild-type and *mfn2*<sup>-/-</sup> quiescent  
1483 MuSCs in the indicated buffers. pyr/mal, pyruvate/malate. rot, rotenone. CCCP, carbonyl  
1484 cyanide m-chlorophenyl hydrazone. **(B)** Mean TMRE fluorescence (normalized) of wild-  
1485 type and *mfn2*<sup>-/-</sup> MuSCs in the indicated buffers. **(C)** Representative FACS profiles of  
1486 mitoSOX fluorescence for quiescent MuSCs of the indicated genotype. **(D)** Mean  
1487 mitoSOX fluorescence (normalized) for MuSCs of the indicated genotype. **(E)** Basal  
1488 mitochondrial oxygen consumption rates (OCR) and maximal (CCCP-stimulated) OCR  
1489 for MuSCs of the indicated genotype. **(F)** In vitro proliferation of MuSCs of the indicated  
1490 genotype. **(G)** Representative immunofluorescent images of differentiated myotubes (in  
1491 vitro) from the indicated genotype. Myosin heavy chain (Myh), neonatal myosin heavy  
1492 chain (Myh8), mitochondria (Dendra2) and nuclei (DAPI) are visualized in the indicated  
1493 colors. Scale bar, 50  $\mu$ m. **(H)** Fusion indices of differentiated MuSCs (in vitro) from the  
1494 indicated genotype. **(I)** Representative immunofluorescent images of differentiated  
1495 myotubes of the indicated genotype. NFATC2, mitochondria (Dendra2), nuclei (DAPI) are  
1496 visualized in the indicated colors. Scale bar, 20  $\mu$ m. **(J)** *Hif1 $\alpha$*  mRNA transcript levels  
1497 (relative to  $\beta$ 2microglobulin; normalized) from in vitro myotubes of the indicated genotype  
1498 measured by qRT-PCR. Statistical significance was assessed using two way-ANOVA  
1499 (B,F), two-tailed t-tests (D,E,H,J), two-tailed Mann-Whitney tests (E) with adjustments for  
1500 multiple comparisons. Box plots indicate median and interquartile ranges from the  
1501 indicated number of biological replicates; whiskers are plotted using the Tukey method.  
1502  
1503

Figure S3

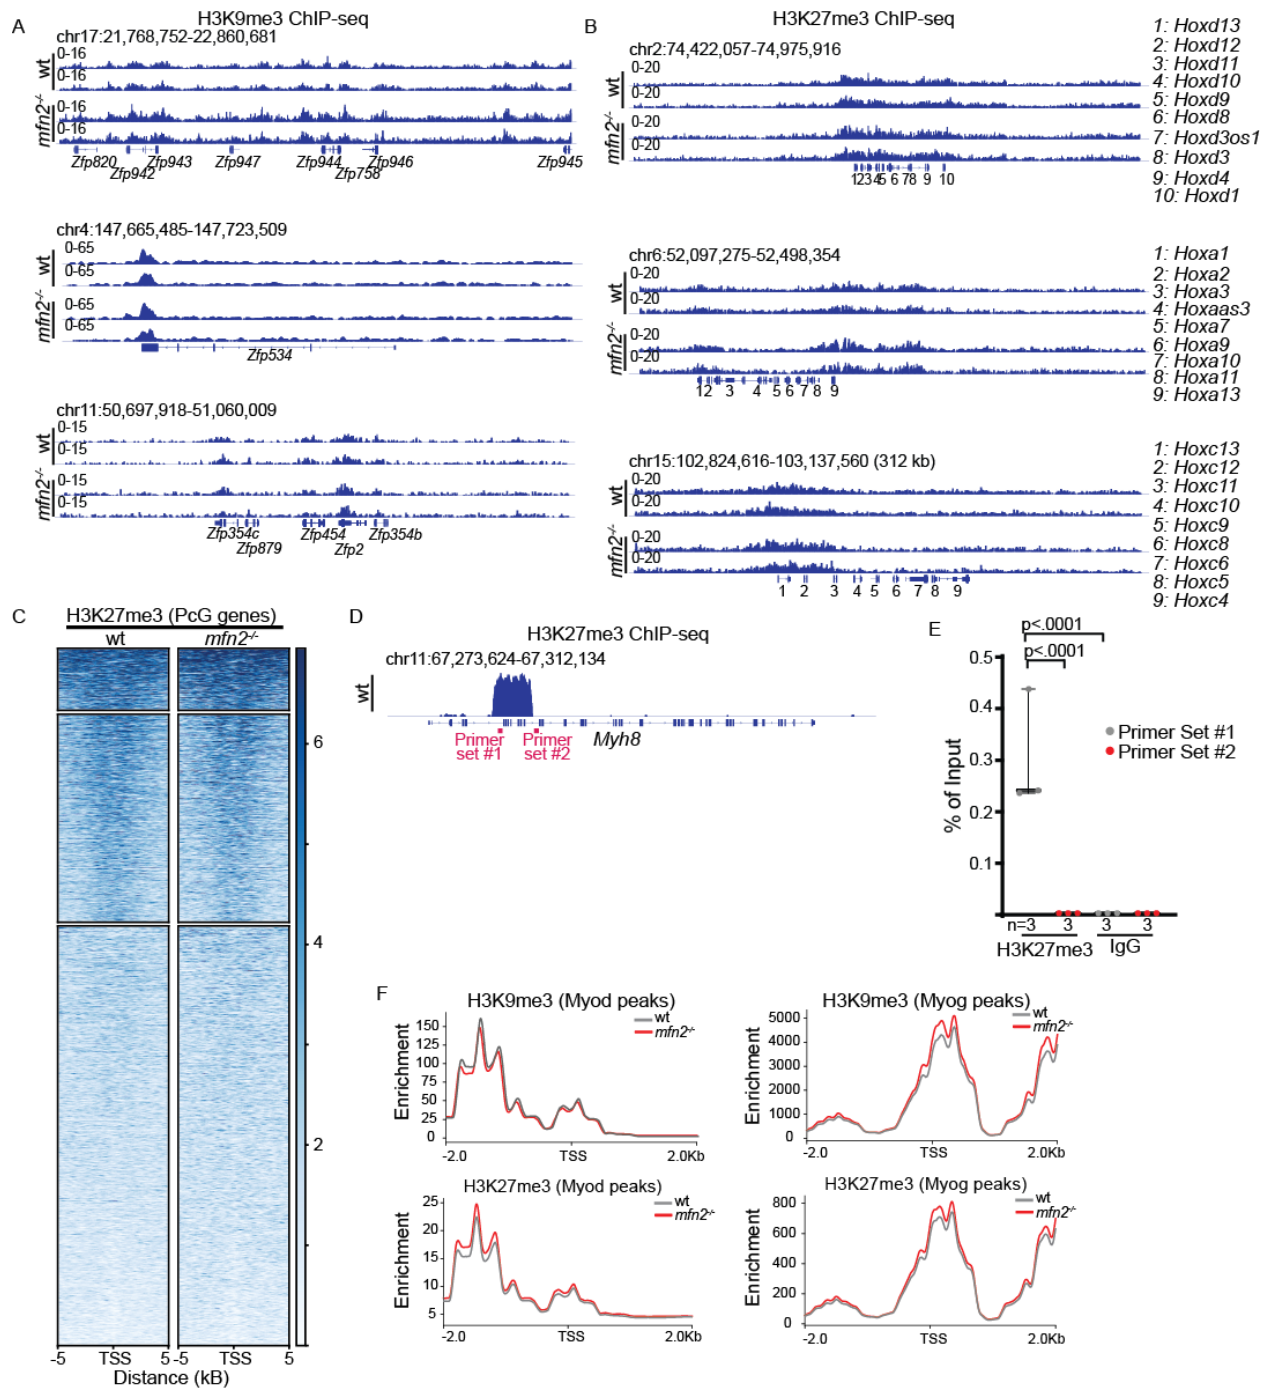

1504

1505 **Supplementary Figure S3. Analysis of H3K9me3 and H3K27me3 ChIP-seq data in**

1506 **14 dpi myofibers. (A)** Representative snapshots of H3K9me3 ChIP-seq analysis at the

1507 indicated zinc finger transcription factor loci, in 14 dpi myofibers of the indicated genotype.



1508 **(B)** Representative snapshots of H3K27me3 ChIP-seq analysis at the indicated Hox  
1509 transcription factor loci, in 14 dpi myofibers of the indicated genotype. **(C)** Heatmaps  
1510 representing normalized H3K27me3 ChIP-seq intensities of PcG target genes in 14 dpi  
1511 myofibers of the indicated genotype, after k-means clustering. Peaks were ranked  
1512 according to their ChIP-seq intensity in wild-type samples. n=3 mice per group. **(D)**  
1513 Representative snapshots of H3K9me3 ChIP-seq analysis at the *Myh8* gene, in 14 dpi  
1514 wild-type myofibers. Positions of primer set #1 and #2 (used in panel e) are indicated. **(E)**  
1515 Enrichment (% of input) from ChIP-qPCR experiments using H3K27me3 or control (IgG)  
1516 antibodies. Two different primer sets targeting the *Myh8* gene were used. Primer set #1  
1517 was located within the H3K27me3 peak; primer set #2 is located outside the H3K27me3  
1518 peak. **(F)** Footprinting plots of H3K9me3 and H3K27me3 deposition in wild-type and *mfn2*<sup>-/-</sup>  
1519 14 dpi myofibers at MyoD and MyoG peaks identified in ASCs (Figure 1C; Table S1).  
1520 Statistical significance was assessed using two tailed t-tests (E) with adjustments for  
1521 multiple comparisons. For each ChIP-seq dataset, three biological replicates were  
1522 analyzed. Box plots indicate median and interquartile ranges from the indicated number  
1523 of biological replicates; whiskers are plotted using the Tukey method.

1524

1525

1526

1527

1528

1529

1530

Figure S4

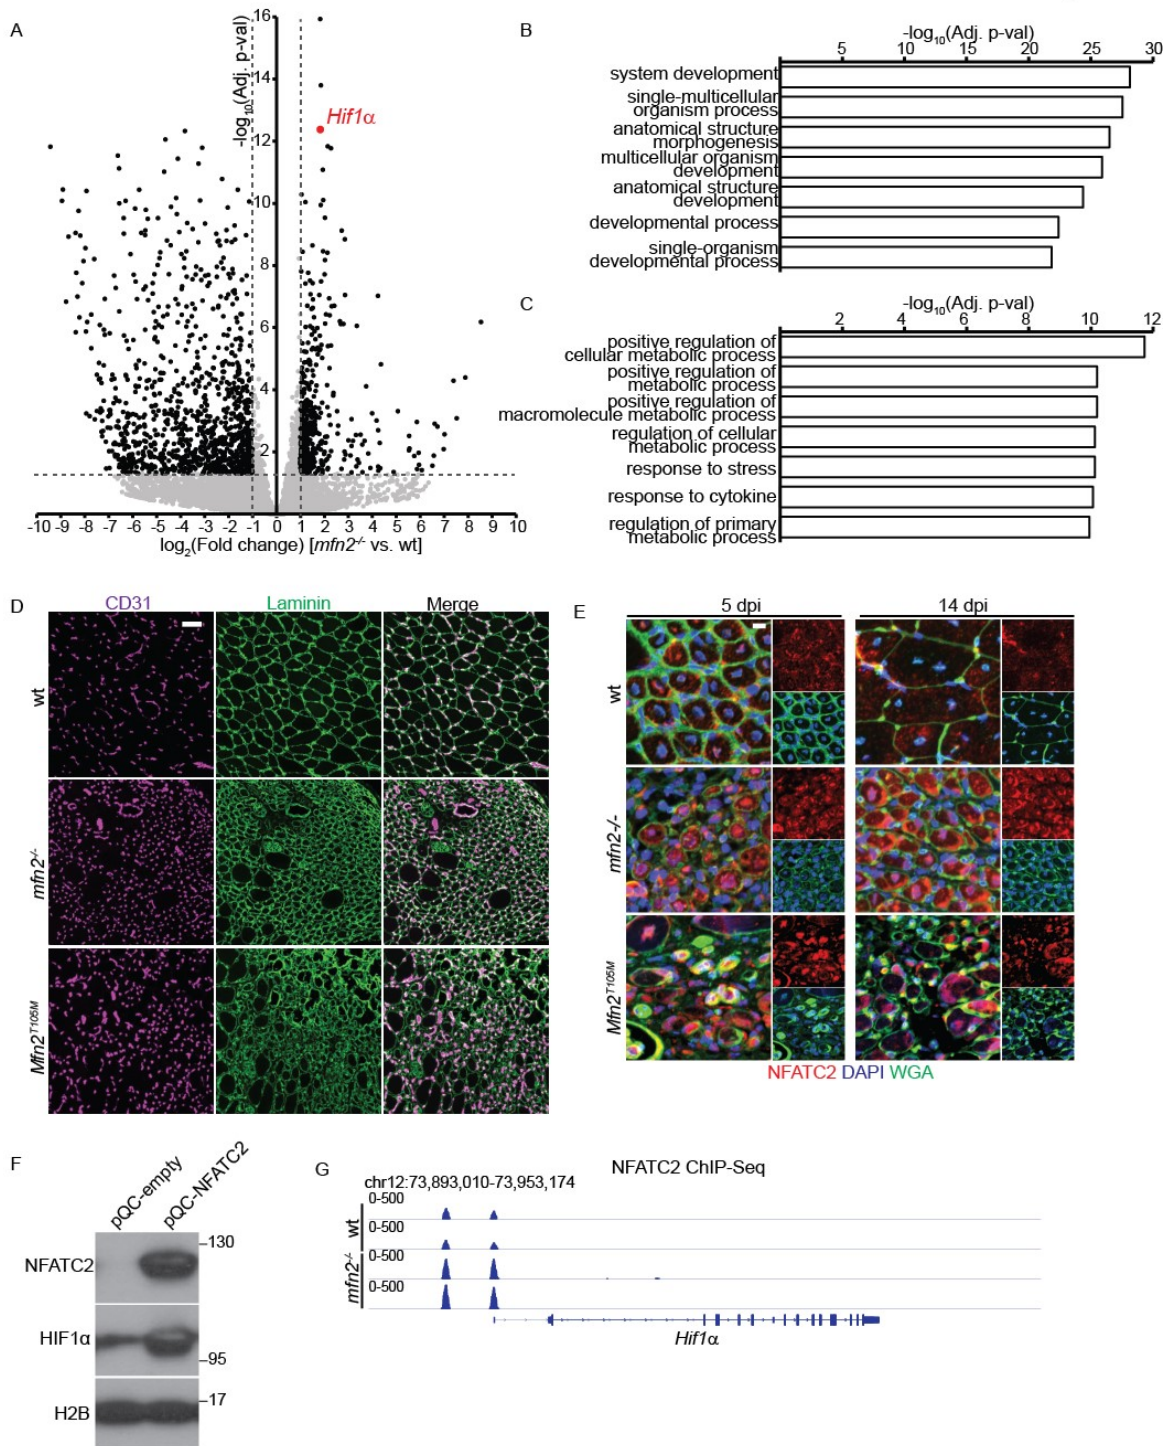

1531

1532 **Supplementary Figure S4. Elevated Hif1 $\alpha$  and NFATc2 signaling in *mfn2*<sup>-/-</sup>**

1533 **regenerating myofibers. (A) Volcano plot of gene expression changes in 2 dpi *mfn2*<sup>-/-</sup>**

1534 vs. wild-type activated MuSCs (ASCs), based on RNAseq analysis. Log<sub>2</sub>(Fold change) is  
1535 potted against the  $-\log_{10}$ (adjusted p-value) for each gene. The position of *Hif1 $\alpha$*  is  
1536 highlighted in red. **(B)** The top enriched biological pathways from gene ontology analysis  
1537 of down-regulated genes ( $\log_2$ (Fold change) < -1; Adjusted p-value < 0.05) in *mfn2*<sup>-/-</sup>  
1538 ASCs. **(C)** The top enriched biological pathways from gene ontology analysis of up-  
1539 regulated genes ( $\log_2$ (Fold change) > 1; Adjusted p-value < 0.05) in *mfn2*<sup>-/-</sup> ASCs. **(D)**  
1540 Representative immunofluorescence images from muscle cross sections of the indicated  
1541 genotype at 14 dpi. Sections were stained for endothelial cells (CD31, purple) and  
1542 myofiber boundaries (laminin, green). Scale bar, 50  $\mu$ m. **(E)** Representative  
1543 immunofluorescence images from muscle cross-sections of the indicated genotype at 5  
1544 and 14 dpi. Sections were stained for NFATC2 (red), DAPI (blue) or myofiber boundaries  
1545 (WGA; green). Scale bar, 10 $\mu$ m. **(F)** Mouse 3T3-L1 fibroblasts were infected with  
1546 retrovirus made with empty vector (pQC-empty) or *NFATC2* expressing vector (pQC-  
1547 *NFATC2*), followed by hypoxia treatment (1% O<sub>2</sub>) for 24 hours. The indicated targets  
1548 were assessed by western blot. Histone 2B (H2B) is shown as a loading control.  
1549 Molecular weight markers (in kDa) are indicated. **(G)** Representative snapshots of  
1550 NFATc2 binding at the *Hif1 $\alpha$*  promoter, in 14 dpi wild-type myofibers of the indicated  
1551 genotype. For each ChIP-seq dataset, 2 biological replicates were analyzed. For each  
1552 RNAseq dataset, 4 biological replicates were analyzed.

1553

1554

1555

1556

Figure S5

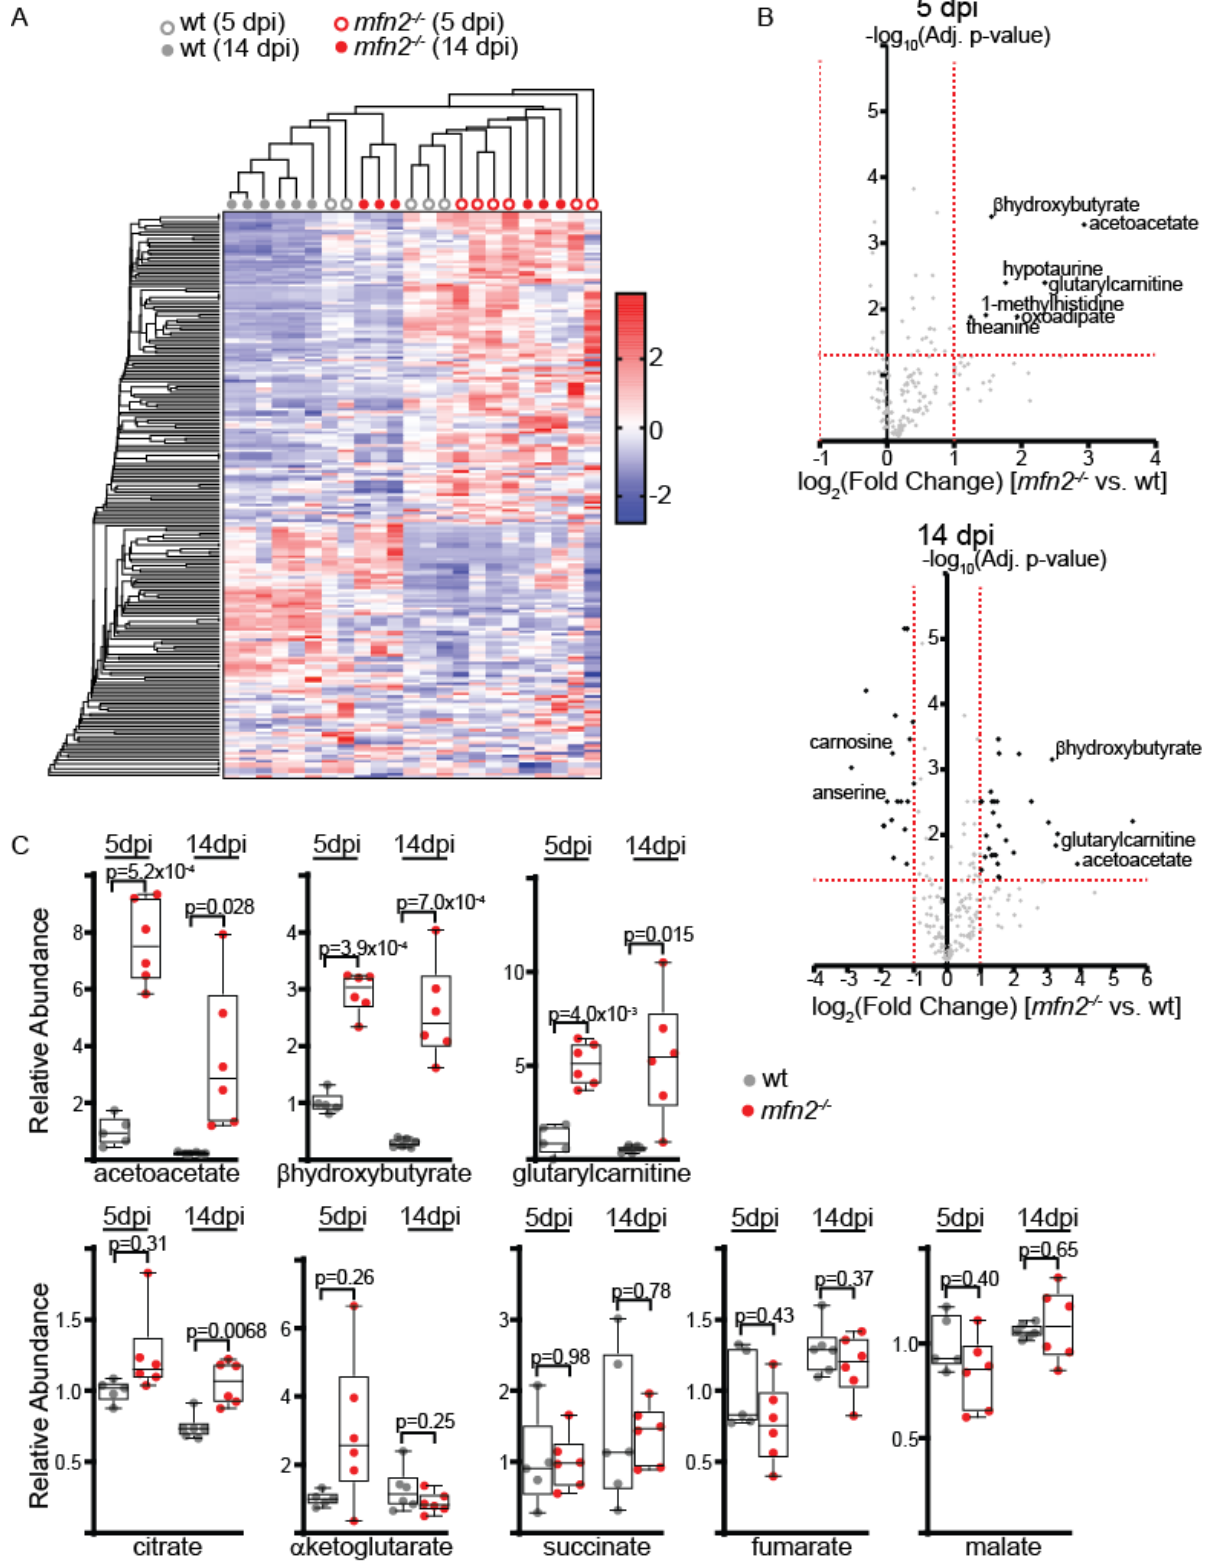

1558 **Supplementary Figure S5. Metabolic analysis of wild-type and *mfn2*<sup>-/-</sup> regenerating**  
1559 **myofibers. (A)** Unsupervised hierarchical clustering of metabolite profiles from wild-type  
1560 and *mfn2*<sup>-/-</sup> myofibers at 5 and 14 dpi. Individual pixels are colored by z-score according  
1561 to the indicated colorbar. n=5-6 mice per group. **(B)** Volcano plots comparing the relative  
1562 fold change in metabolite abundance between wt and *mfn2*<sup>-/-</sup> myofibers at 5 dpi (top) and  
1563 14 dpi (bottom). Metabolites shown in black were significantly changed (adjusted p-value  
1564 < 0.05; |log<sub>2</sub>(Fold change)| > 1). **(C)** Relative metabolite abundances of the selected TCA  
1565 cycle and ketogenic metabolites in myofibers of the indicated genotype and 5 and 14 dpi.  
1566 n=5-6 mice per group. Statistical significance was assessed using two tailed t-tests (B,C)  
1567 with adjustments for multiple comparisons. Box plots indicate median and interquartile  
1568 ranges from the indicated number of biological replicates; whiskers are plotted using the  
1569 Tukey method.

1570

1571

1572

1573

1574

1575

1576

1577

1578

1579

1580

1581

Figure S6

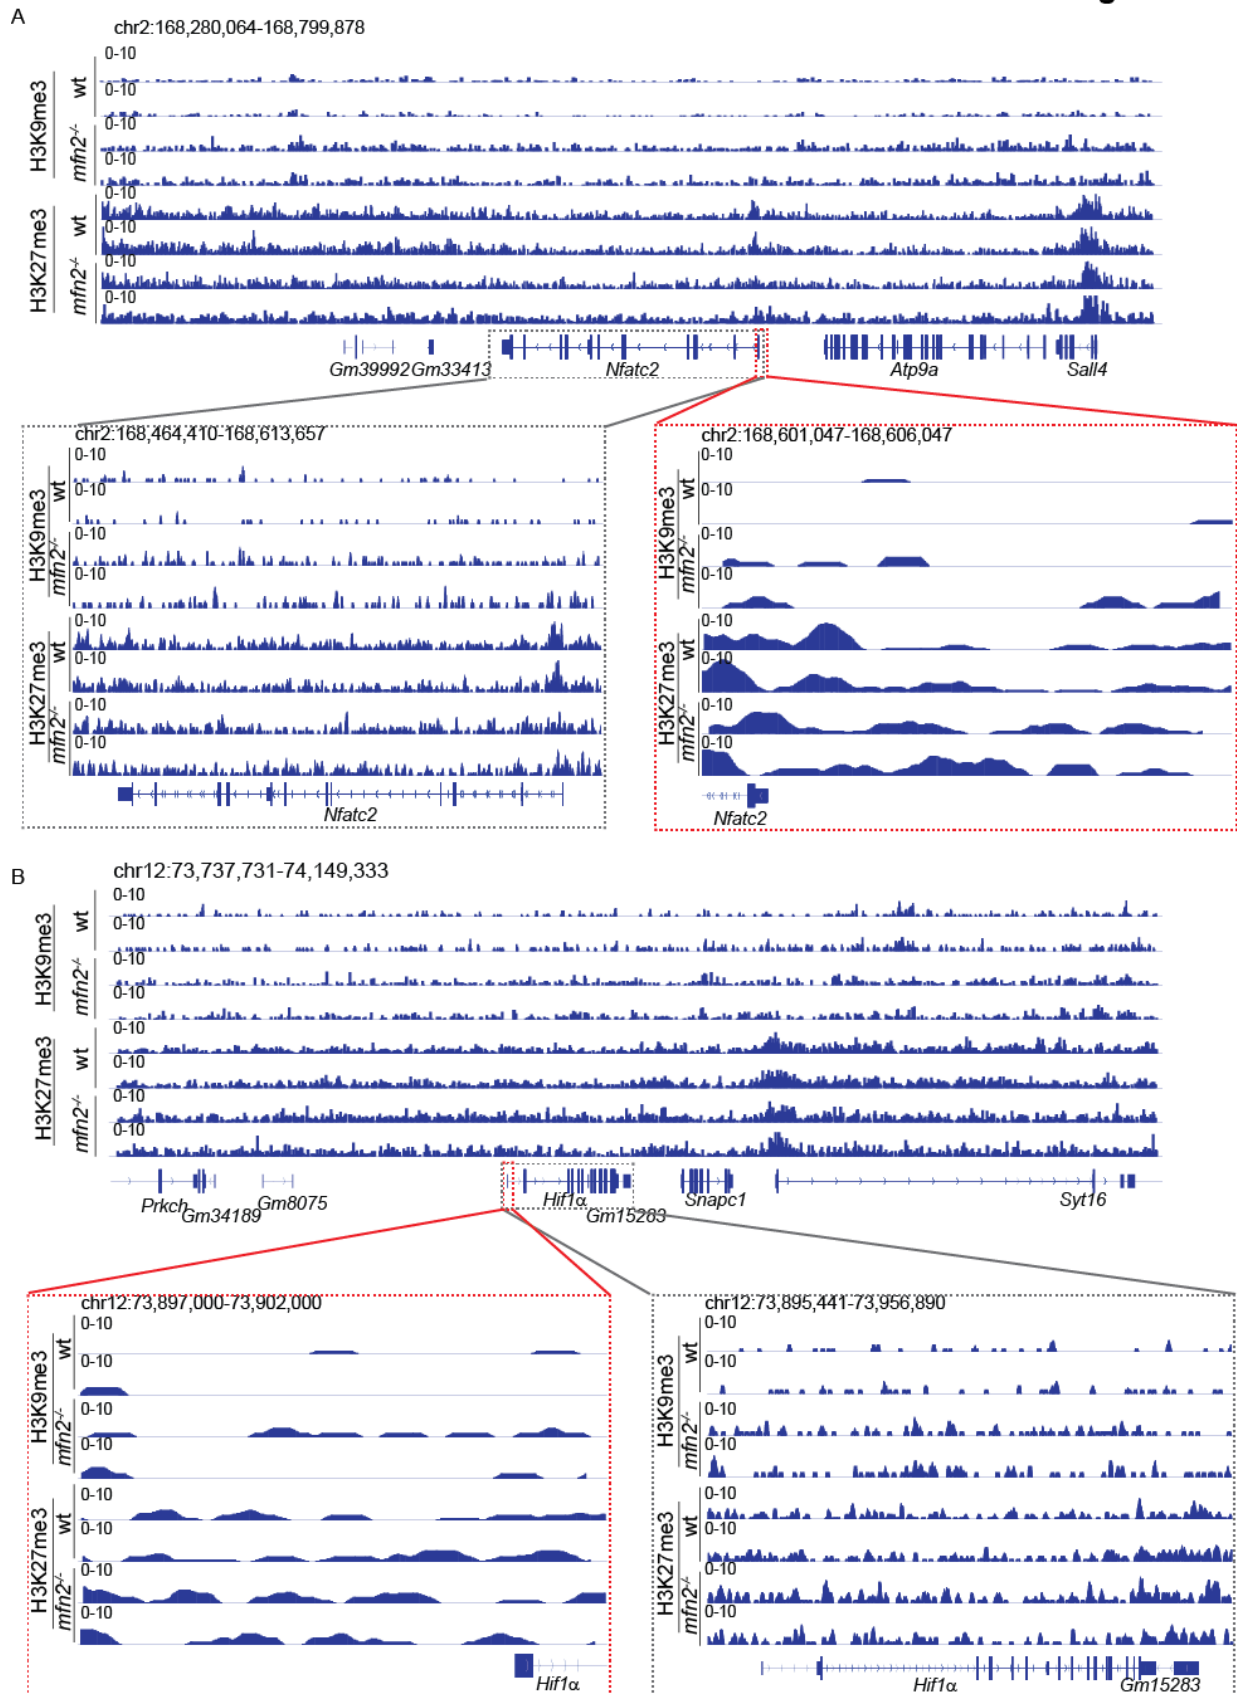

1583 **Supplementary Figure S6. H3K9me3 and H3K27me3 profiles in wild-type and *mfn2***  
1584 ***-/-* myofibers. (A)** Representative snapshots of H3K9me3 and H3K27me3 profiles at the  
1585 *Nfatc2* locus. Enlarged views are shown for the entire gene body (gray) and the promoter  
1586 region (red). **(B)** Representative snapshots of H3K9me3 and H3K27me3 profiles at the  
1587 *Hif1 $\alpha$*  locus. Enlarged views are shown for the entire gene body (gray) and the promoter  
1588 region (red). For each ChIP-seq dataset, 3 biological replicates were analyzed.

1589

1590

1591

1592

1593

1594

1595

1596

1597

1598

1599

1600

1601

1602

1603

1604

1605

Figure S7

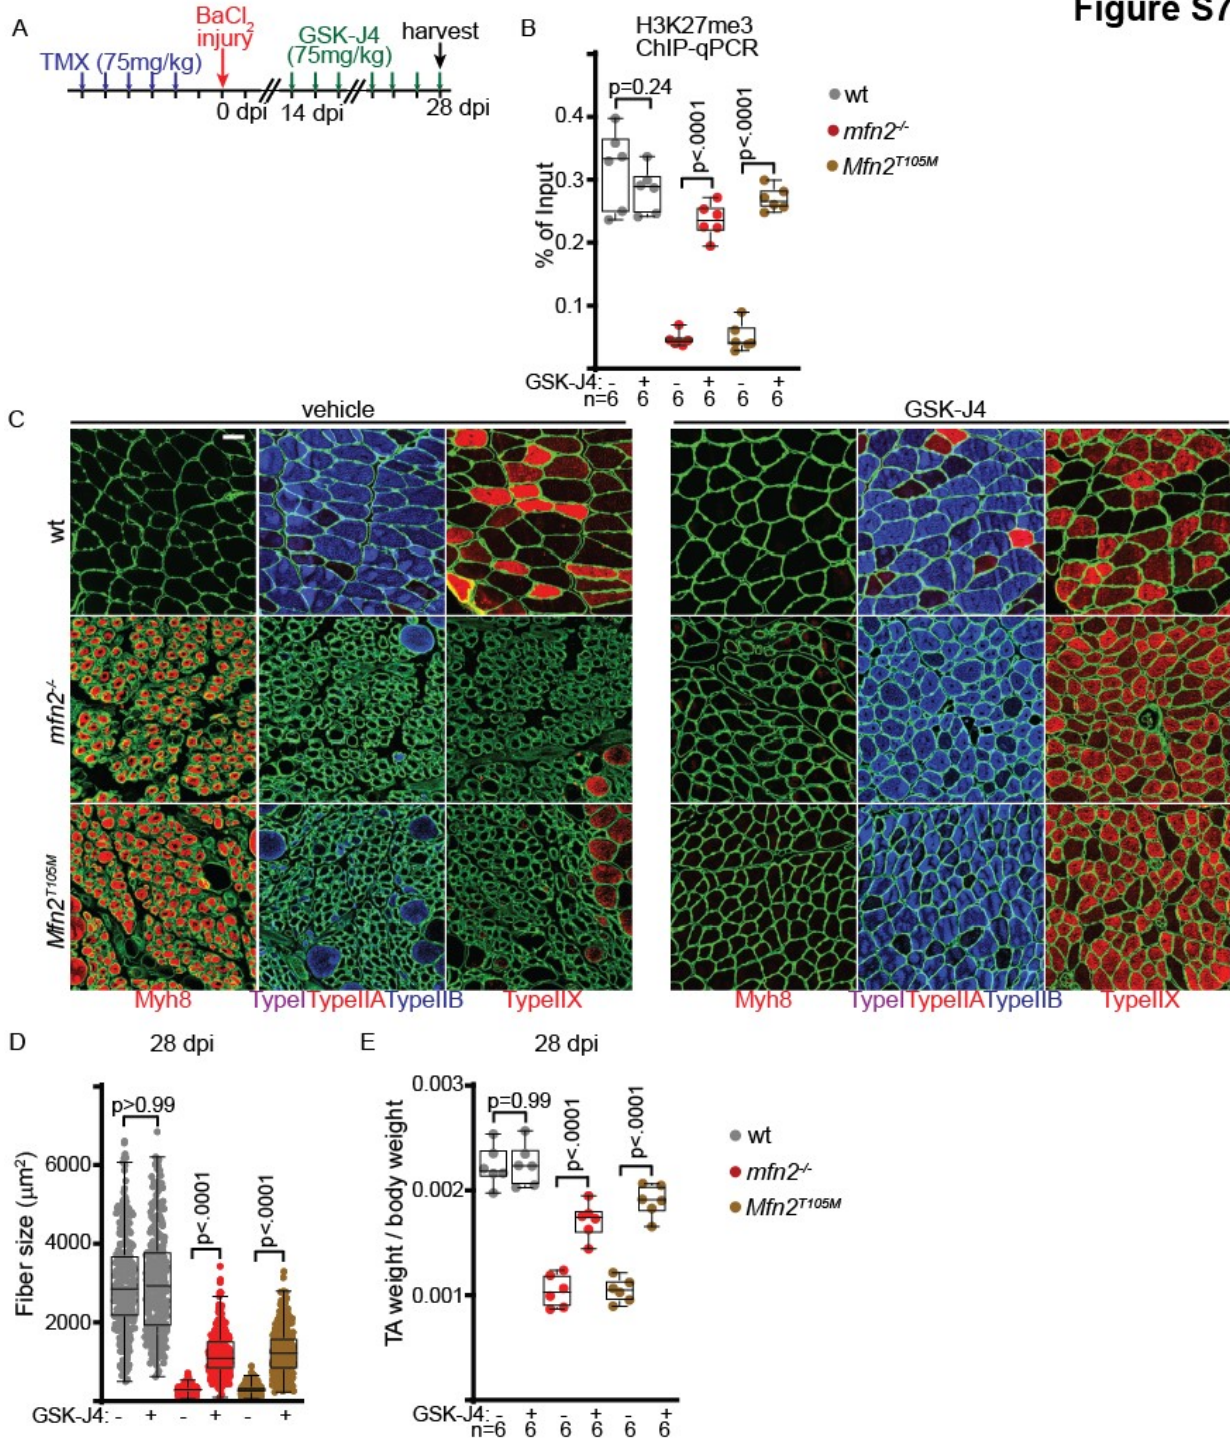

1606

1607 **Supplementary Figure S7. Inhibition of H3K27me3 demethylases allows Mfn2-**

1608 **mutant myofibers to adopt adult fates. (A)** Schematic of GSK-J4 experiment.

1609 Tamoxifen (TMX) was administered for 5 consecutive days to induce recombination,



1610 followed by BaCl<sub>2</sub> administration to injure muscles. At 14 dpi, mice were subsequently  
1611 treated with GSK-J4 (or vehicle) every day. Tissue was harvested at 28 dpi for analysis.  
1612 **(B)** Quantitation of enrichment (% of input) from H3K27me3 ChIP-qPCR experiments  
1613 targeting the *Myh8* gene. Experiments were performed in 28 dpi myofibers from animals  
1614 of the indicated genotype and treatment condition. **(C)** Representative  
1615 immunofluorescence images of muscle cross-sections from mice of the indicated  
1616 genotype and treatment condition at 28 dpi. Sections were stained with antibodies  
1617 targeting fiber-type specific myosin heavy chains, including Myh7 (type I; purple), Myh2  
1618 (type IIa; red), Myh4 (type IIb; blue), Myh1 (type IIx; red), and Myh8 (neonatal; red).  
1619 Myofiber borders were visualized with Laminin staining (green). Scale bar, 50 μm. **(D)**  
1620 Cross-sectional area of regenerating fibers from muscles of the indicated genotype and  
1621 treatment conditions at 28 dpi. 300 myofibers were analyzed from n=6 mice per group.  
1622 **(E)** Tibialis anterior (TA) muscle weight (normalized to body weight) from mice of the  
1623 indicated genotype and treatment condition at 28 dpi. Statistical significance was  
1624 assessed using two-way ANOVA (B,E), or Kruskal-Wallis (D) tests with adjustments for  
1625 multiple comparisons. Box plots indicate median and interquartile ranges from the  
1626 indicated number of biological replicates; whiskers are plotted using the Tukey method.  
1627  
1628  
1629  
1630  
1631  
1632

Figure S8

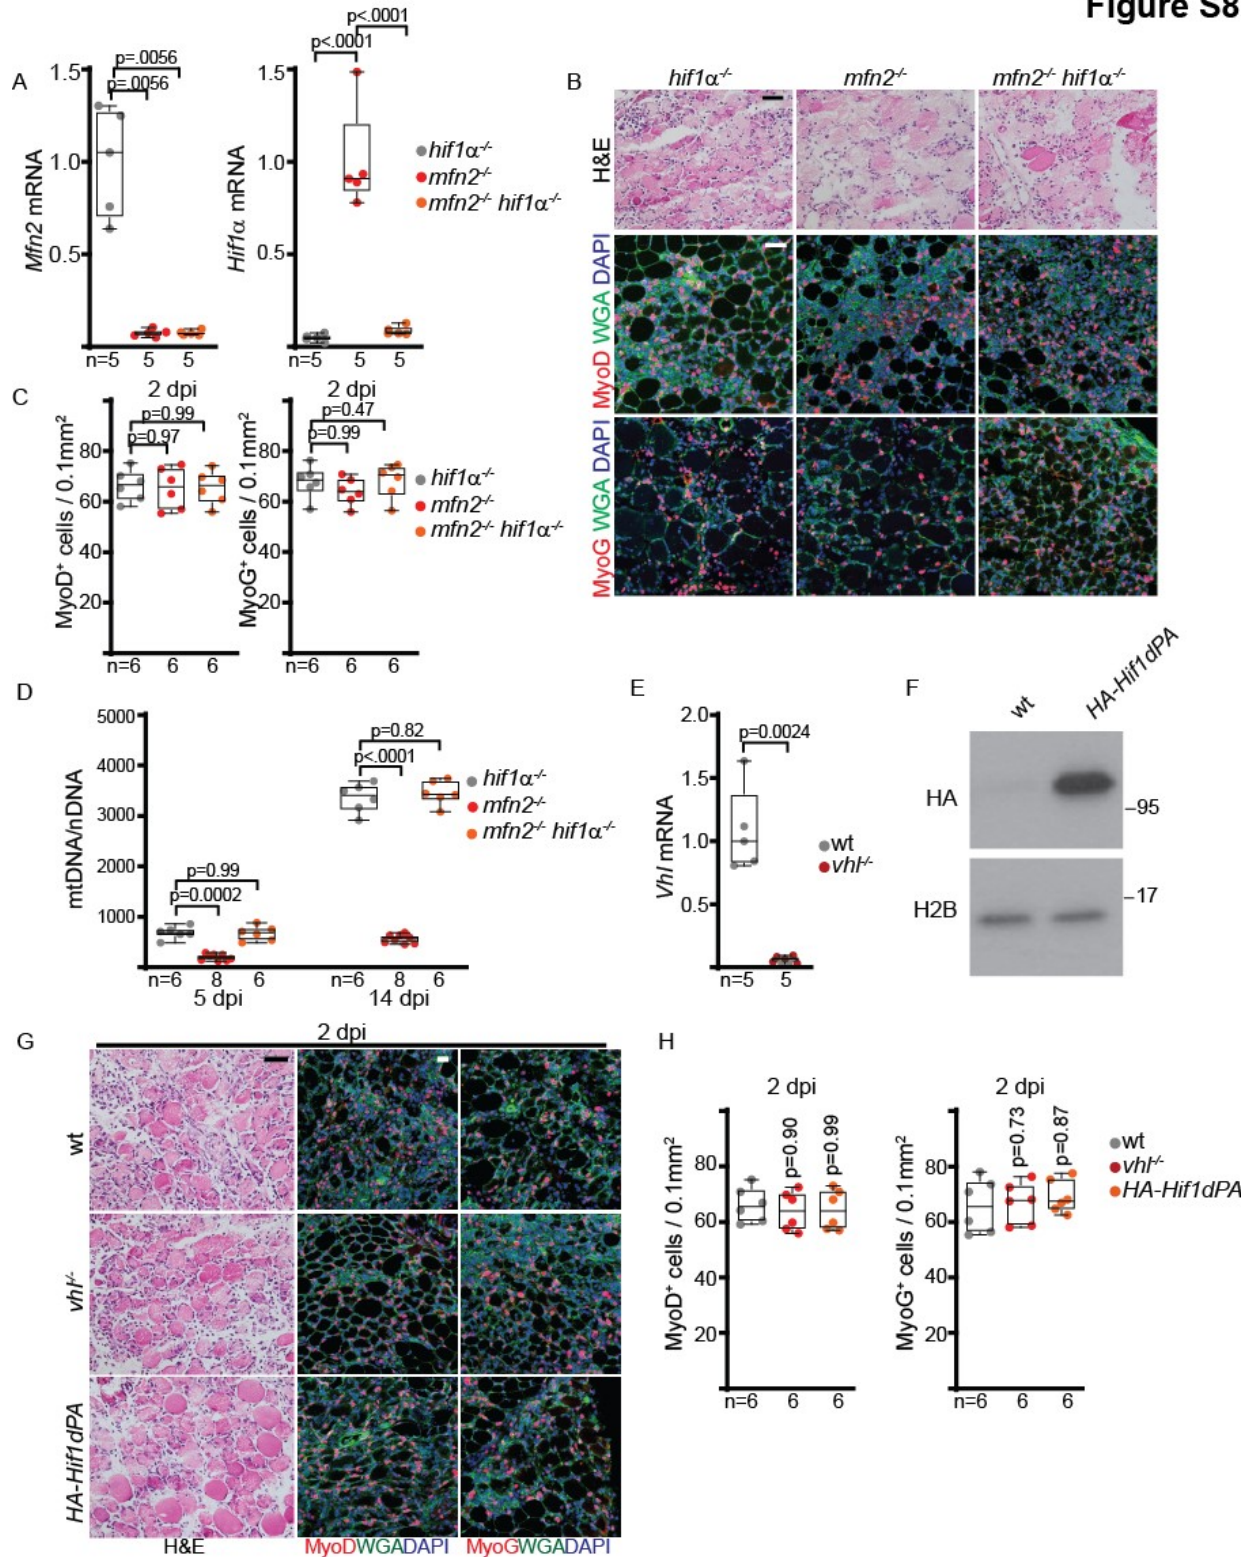

1633

1634 **Supplementary Figure S8. Hif1α is not required for activation of MuSCs. (A) *Mfn2***

1635 **and *Hif1α* mRNA levels (relative to  $\beta$ 2-microglobulin; normalized) in 2 dpi ASCs of the**

1636 indicated genotype, as measured by qRT-PCR. **(B)** Representative histology (H&E) and  
1637 immunofluorescence images of muscle cross-sections from mice of the indicated  
1638 genotypes at 2 dpi. For immunofluorescence images, nuclei were visualized with DAPI  
1639 (blue), myofiber borders were visualized with laminin staining (green), and MyoD or MyoG  
1640 (red) were stained using their respective antibodies. Scale bar, 50  $\mu\text{m}$ . **(C)** The number  
1641 of activated stem cells (MyoD<sup>+</sup> or MyoG<sup>+</sup>) from muscles of the indicated genotype at 2  
1642 dpi, normalized to cross-sectional area. **(D)** Mitochondrial genome (mtDNA) content,  
1643 normalized to nuclear genome content (nDNA) in 5 and 14 dpi myofibers of the indicated  
1644 genotype, assessed by qPCR. **(E)** *Vhl* mRNA levels (relative to  $\beta$ 2-microglobulin;  
1645 normalized) in 2 dpi ASCs of the indicated genotype, assessed by qRT-PCR. **(F)** HA-  
1646 Hif1dPA protein levels in 2 dpi ASCs of the indicated genotype, assessed by Western  
1647 blot. Molecular weight markers (in kDa) are indicated. Histone 2B (H2B) is shown as a  
1648 loading control. **(G)** Representative histology (H&E) and immunofluorescence images of  
1649 muscle cross-sections from mice of the indicated genotypes at 2 dpi. For  
1650 immunofluorescence images, nuclei were visualized with DAPI (blue), myofiber borders  
1651 were visualized with laminin staining (green), and MyoD or MyoG (red) were stained using  
1652 their respective antibodies. Scale bar, 50  $\mu\text{m}$ . **(H)** The number of activated stem cells  
1653 (MyoD<sup>+</sup> or MyoG<sup>+</sup>) from muscles of the indicated genotype at 2 dpi, normalized to cross-  
1654 sectional area. p-values indicate comparisons with the wild-type group. Statistical  
1655 significance was assessed using one-way ANOVA (A,C,H), two-tailed t-test (E) or two-  
1656 way ANOVA (D) with adjustments for multiple comparisons. Box plots indicate median  
1657 and interquartile ranges from the indicated number of biological replicates; whiskers are  
1658 plotted using the Tukey method.

**Figure S9**

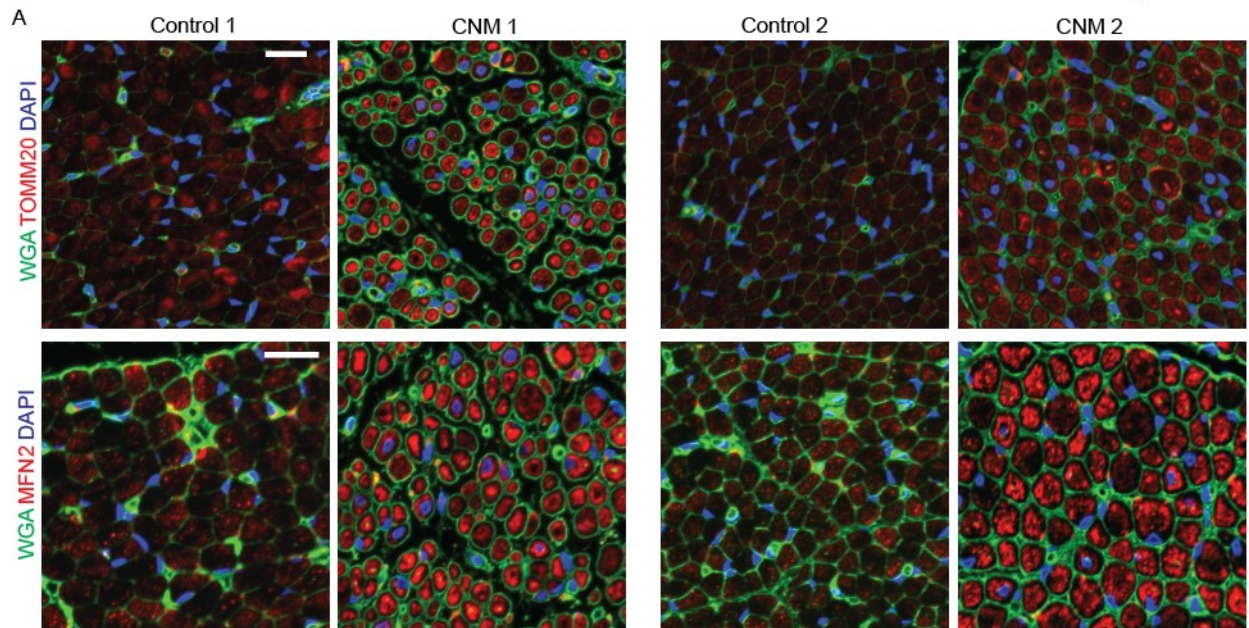

1659

1660 **Supplementary Figure S9: Peri-nuclear mitochondrial localization in CNM muscle**

1661 **specimens. (A)** Representative immunofluorescence images for TOMM20

1662 (mitochondria), or MFN2 from a patient with infantile CNM due to a *Dnm2* mutation

1663 (CNM1) and an age/sex-matched control (Control 1), and a patient with infantile CNM

1664 due to a *Mtm1* mutation (CNM2) and an age/sex-matched control (Control 2). Myofiber

1665 boundaries are visualized with WGA staining, and nuclei are visualized with DAPI

1666 staining. Scale bar, 20  $\mu$ m.

1667

1668

1669

1670

1671

1672

1673

**Figure S10**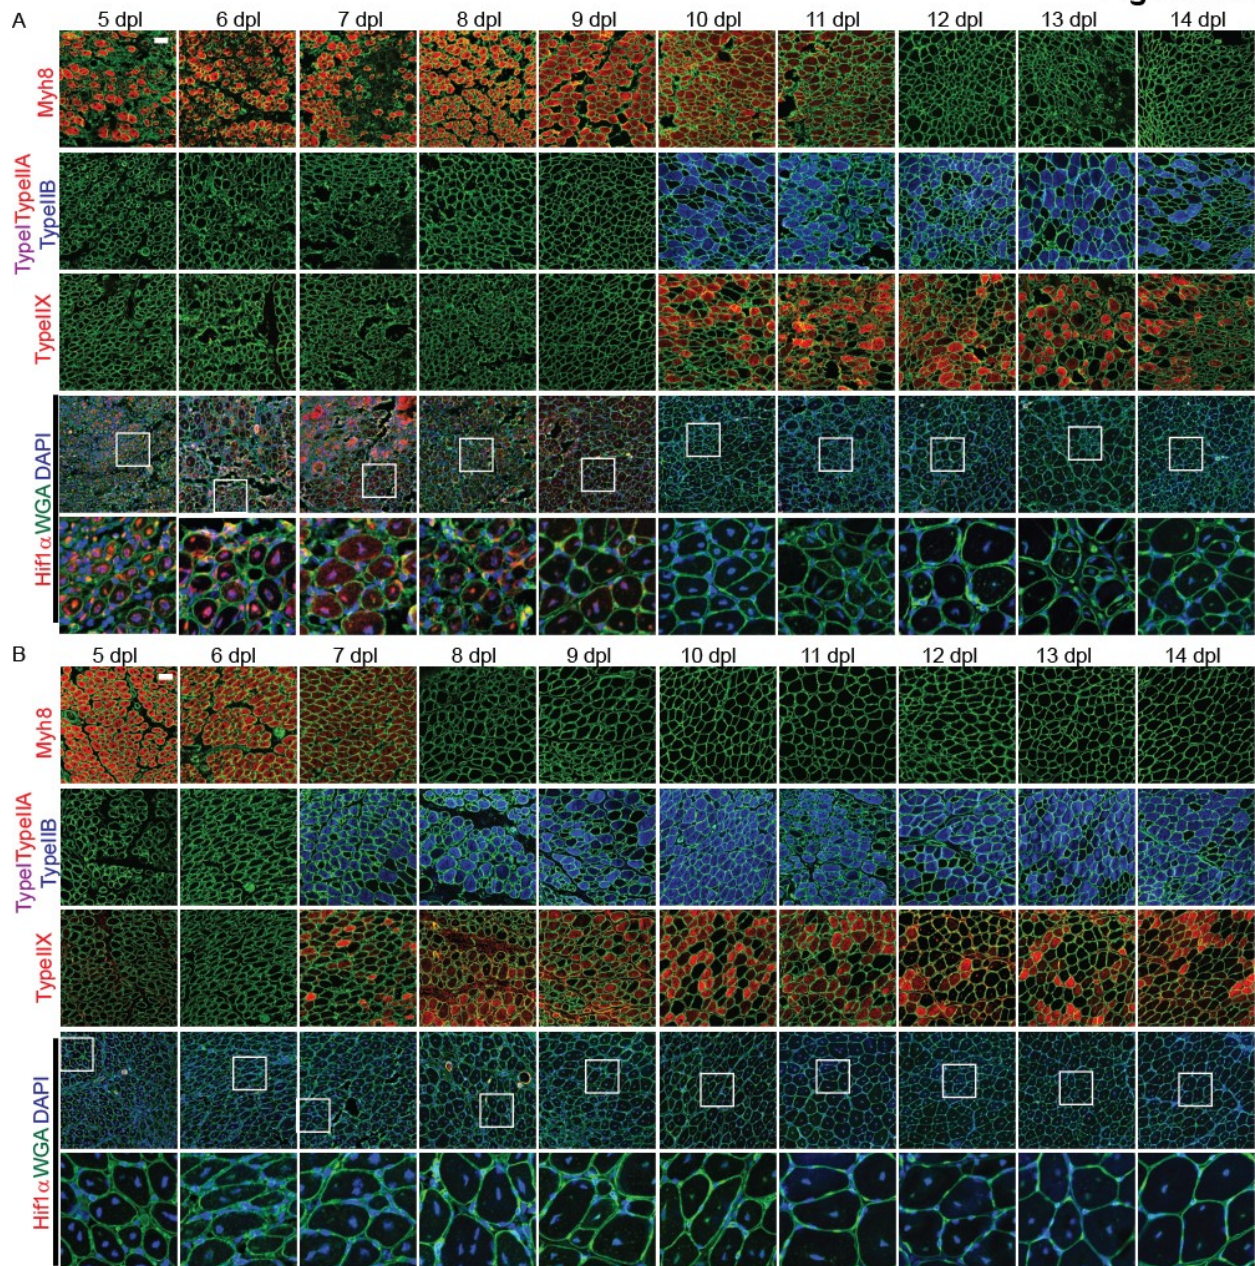

1674

1675 **Supplementary Figure S10. Regenerating myofibers pause at the neonatal-adult**1676 **transition in response to ischemic injury. (A)** Representative immunofluorescence

1677 images of muscle cross-sections from wild-type mice at the indicated time point. Muscle

1678 cross-sections were stained with antibodies targeting fiber-type specific myosin heavy

1679 chains, including Myh7 (type I; purple), Myh2 (type IIa; red), Myh4 (type IIb; blue), Myh1

1680 (type IIx; red), and Myh8 (neonatal; red), or Hif1 $\alpha$  (red). Nuclei were visualized with DAPI,  
1681 and myofiber boundaries were visualized with Laminin staining (green) or WGA (green).  
1682 Scale bar: 50  $\mu$ m. dpl, days post ligation. **(B)** Same as (a), except with *hif1* $\alpha$ <sup>-/-</sup> animals.

1683

1684

1685

1686

1687

1688

1689

1690

1691

1692

1693

1694

1695

1696

1697

1698

1699

1700

1701

1702

Figure S11

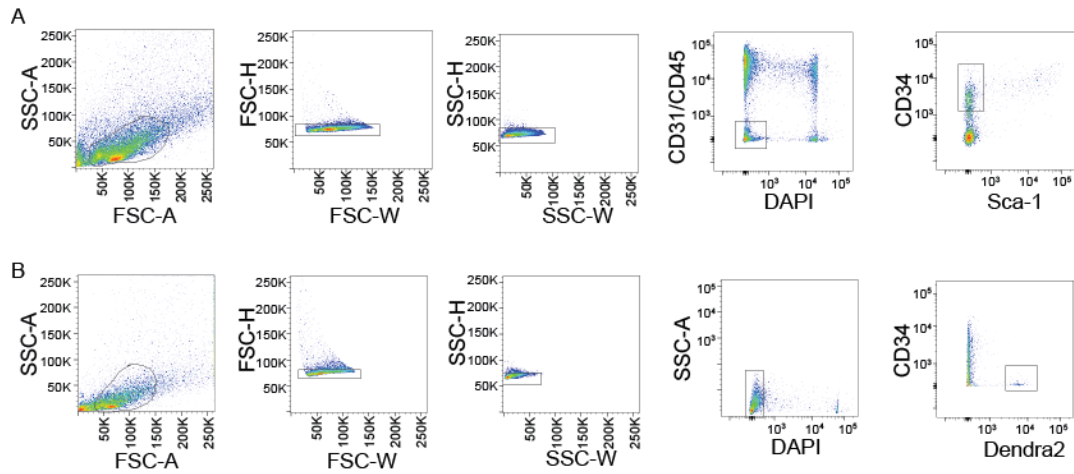

1703

1704 **Supplementary Figure S11: Representative gating strategy for MuSC isolation. (A)**

1705 Representative gating strategy for quiescent MuSCs. **(B)** Representative gating strategy

1706 for activated MuSCs.

1707

1708

1709

1710

1711

1712

1713

1714

1715

1716

1717

1718

1719





1723 values are indicated for each motif. **(B)** Same as (A), except for H3K27me3 peaks. **(C)**  
1724 Top enriched motifs for H3K27me3 differentially expressed peaks between wt and *mfn2*<sup>-/-</sup>  
1725 <sup>-/-</sup> myofibers in either promoter regions (“Promoter”) or genome-wide (“All”). **(D)** Signal  
1726 enrichment curves for transcription factor binding to their respective consensus binding  
1727 sequences in the indicated data set. For each ChIP-seq dataset, 3 biological replicates  
1728 were analyzed, except for NFATC2 binding, where 2 biological replicates were analyzed.
